# Supplementary material for: Predicting copper leaching from slag: an interpretable machine learning approach under oxidative sulfuric acid conditions
Source: Royal Society of Chemistry journal article supplement (doi:10.1039/d6ra01571a), 2026-04-13
Supplement: d6ra01571a1.pdf [file d6ra01571a1.pdf]

## Predicting Copper Leaching from Slag: An Interpretable Machine Learning Approach under Oxidative Sulfuric Acid Conditions

Sung-Jin Kim<sup>a,\*</sup>, Song-Sae Kang<sup>b</sup>, Kyong-Nam Pae<sup>c</sup>, Song-Il Pak<sup>b</sup>, Hyon-Il Jo<sup>b</sup>, Ryong-Jin Kim<sup>a</sup>

<sup>a</sup> Faculty of Materials Science, Kim Il Sung University, Pyongyang 497335, Democratic People's Republic of Korea

<sup>b</sup> Faculty of Information Engineering, Pyongyang HanTokSu University of Light Industry, Pyongyang 999093, Democratic People's Republic of Korea

<sup>c</sup> Faculty of Physical Engineering, Kim Chaek University of Technology, Pyongyang 950003, Democratic People's Republic of Korea

\*E-mail: ksj1223@163.com

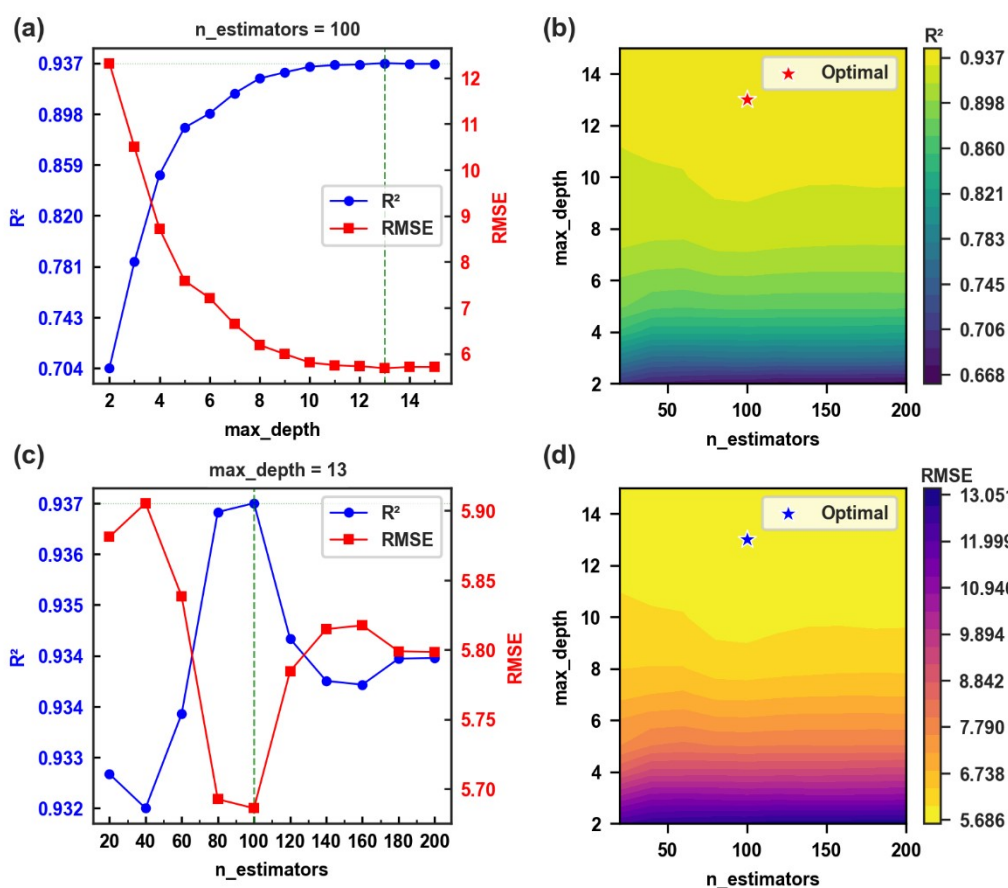

Fig.S1 (a) Optimization for the parameter of  $\max\_depth$  of the RF model; (b) Optimization for the parameter of  $n\_estimator$  of the RF model; (c) Dependence of  $R^2$  with the  $\max\_depth$  and  $n\_estimators$ ; (d) Dependence of RMSE with the  $\max\_depth$  and  $n\_estimators$

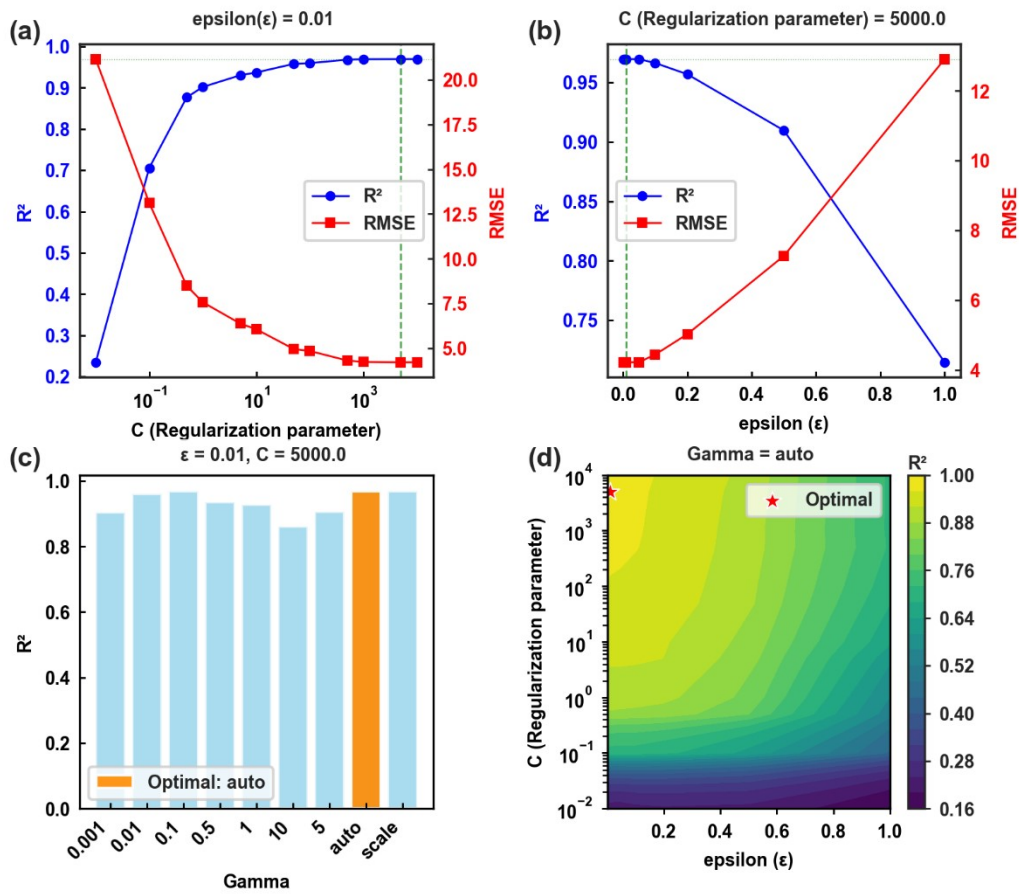

Fig.S2 (a) Optimization for the parameter of C of the SVR model; (b) Optimization for the parameter of epsilon of the SVR model; (c) Optimization for the parameter of gamma of the SVR model; (d) Dependence of  $R^2$  with the C and epsilon

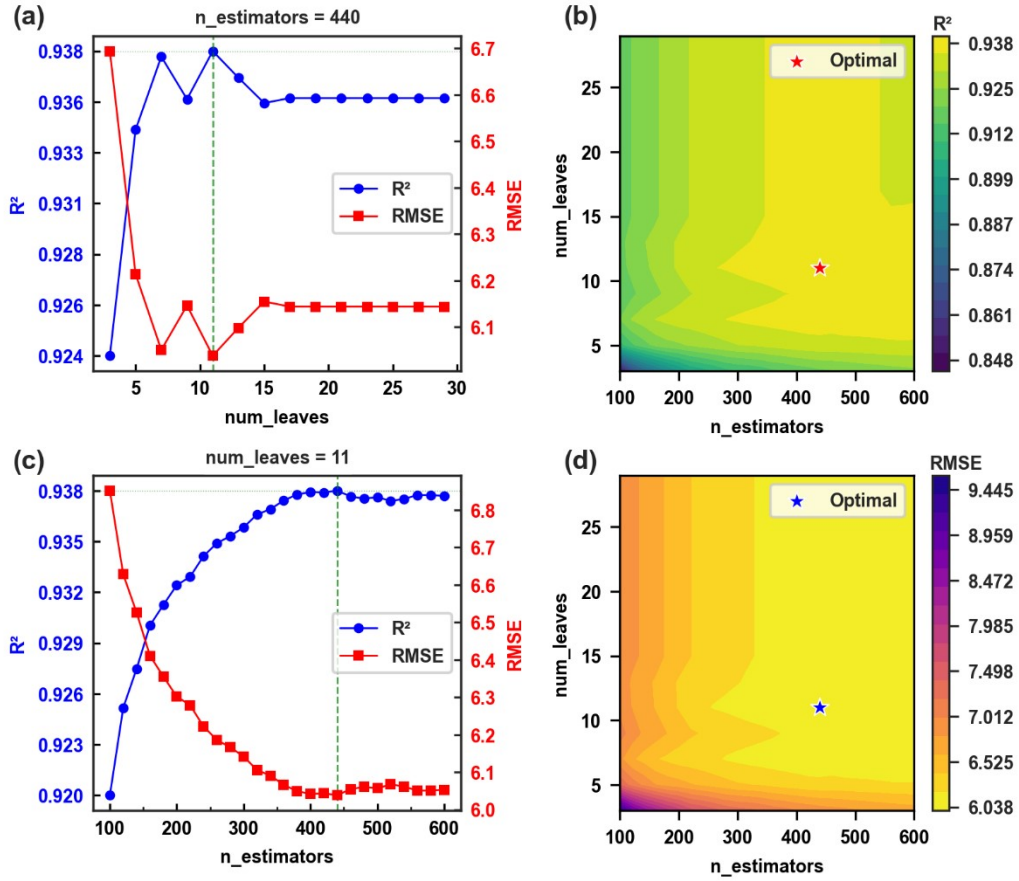

Fig.S3 (a) Optimization for the parameter of  $num\_leaves$  of the LightGBM model; (b) Optimization for the parameter of  $n\_estimator$  of the LightGBM model; (c) Dependence of  $R^2$  with the  $max\_depth$  and  $n\_estimators$ ; (d) Dependence of RMSE with the  $max\_depth$  and  $n\_estimators$

Table S1. Hyperparameter search ranges and optimal values obtained through grid-search optimization.

| Model         | Hyperparameter  | Search range          | Optimal value |
|---------------|-----------------|-----------------------|---------------|
| XGBoost       | $max\_depth$    | 2-15                  | 4             |
|               | $n\_estimators$ | 20-200                | 150           |
| Random Forest | $max\_depth$    | 2-15                  | 13            |
|               | $n\_estimators$ | 20-200                | 100           |
| LightGBM      | $num\_leaves$   | 3-30                  | 11            |
|               | $n\_estimators$ | 100-600               | 440           |
| SVR           | C               | 0.01-10000            | 5000          |
|               | epsilon         | 0.001-1.0             | 0.01          |
|               | gamma           | auto, scale, 0.001-10 | auto          |

Table S2. Training times of the four machine learning models under identical

conditions.

| Model         | Training time (s) |
|---------------|-------------------|
| XGBoost       | 0.53              |
| Random Forest | 0.51              |
| LightGBM      | 0.33              |
| SVR           | 1.26              |

Table S3. Recommended operating ranges for copper slag leaching parameters derived from SHAP partial dependence analysis of the XGBoost model.

| Parameter                  | Recommended range | SHAP effect / interpretation                                           |
|----------------------------|-------------------|------------------------------------------------------------------------|
| Leaching time (min)        | 40-80             | Positive influence; SHAP increases rapidly then plateaus beyond 80 min |
| Temperature (°C)           | 120-160           | Positive; monotonic increase, plateau at high end                      |
| Acid concentration (mol/L) | 0.5-1.5           | Positive; sharp increase below 0.5, plateau beyond 1.5                 |
| Oxygen pressure (kPa)      | 100-1000          | Positive; effect diminishes above 1000                                 |
| Pulp density (%)           | 5-30              | Negative trend; lower pulp density favors efficiency                   |
| Particle size (µm)         | <75               | Negative trend; smaller particle size favors efficiency                |
